# Supplementary material
Source: MDPI journal article supplement (https://www.mdpi.com/2073-4344/12/3/286)
Supplement: s1 [file s1]

## Supporting Information

# Alkali-Free Hydrothermally Reconstructed NiAl Layered Double Hydroxides for Catalytic Transesterification

Nazrizawati A. Tajuddin <sup>1</sup>, Jinesh C. Manayil <sup>2</sup>, Adam F. Lee <sup>3</sup> and Karen Wilson <sup>3,\*</sup>

<sup>1</sup> School of Chemistry and Environment, Faculty of Applied Sciences, University of Technology MARA, 40450 Shah Alam, Malaysia; nazriza@uitm.edu.my

<sup>2</sup> Energy & Bioproducts Research Institute (EBRI), Aston University, Birmingham B4 7ET, UK; j.manayil@aston.ac.uk

<sup>3</sup> CAMIC, School of Science, RMIT University, 124 La Trobe Street, Melbourne, VIC 3000, Australia; adam.lee2@rmit.edu.au

\* Correspondence: karen.wilson2@rmit.edu.au

### 1. Characterisation

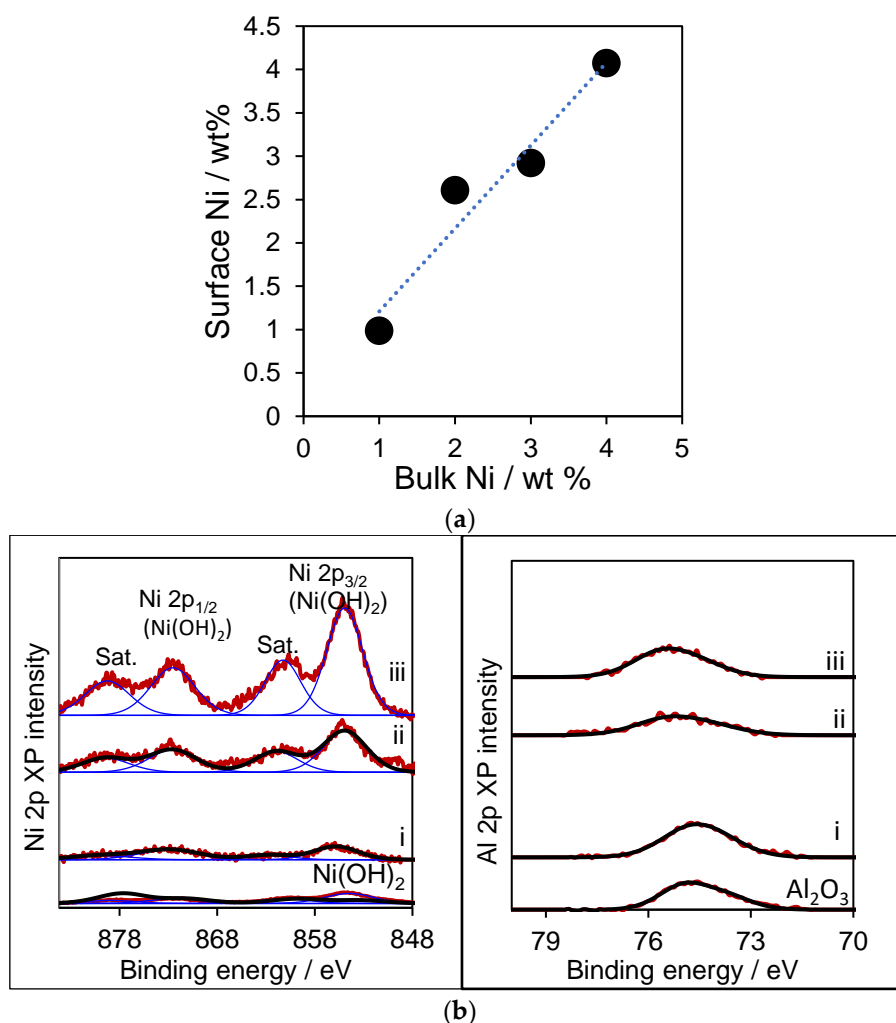

**Figure S1.** (a) Ni surface and bulk loading of NiAl LDHs determined by XPS and EDS respectively; (b) High-resolution XP spectra of NiAl LDHs with nominal Ni:Al atomic ratios of (i) 1.5, (ii) 3 and (iii) 4.

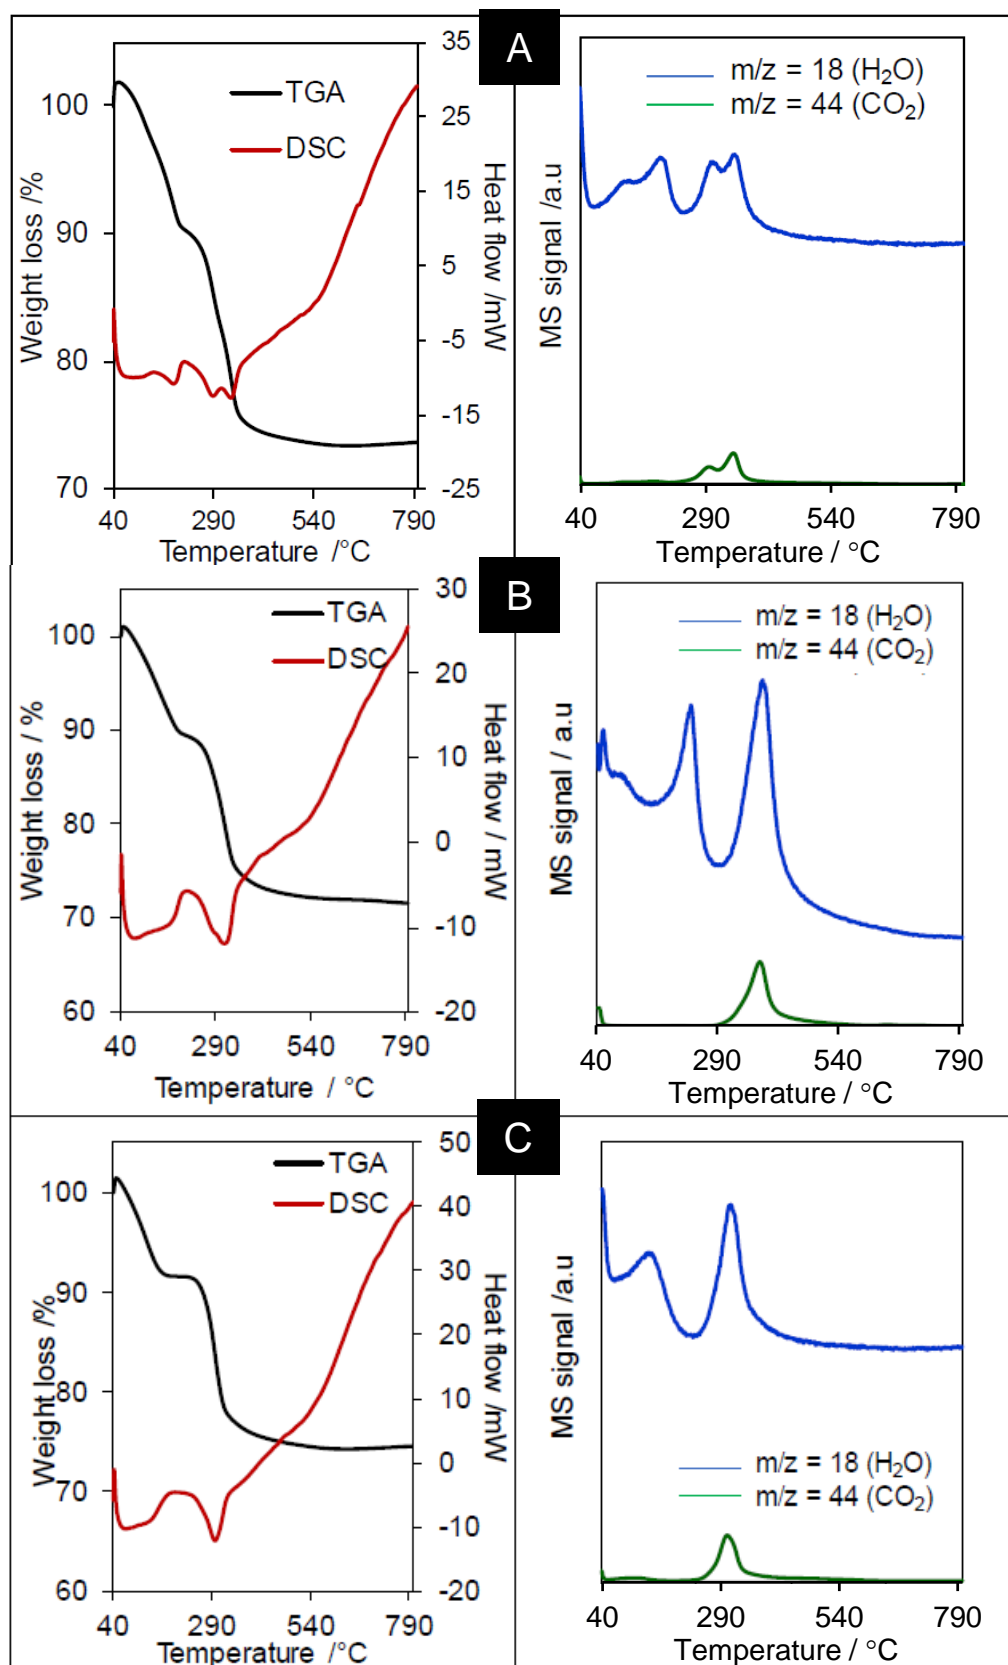

**Figure S2.** Thermogravimetric analysis of NiAl LDHs with nominal Ni:Al atomic ratios of (A) 1.5, (B) 3 and (C) 4.

**Table S1.** Weight losses from TGA.

| Ni:Al ratio <sup>a</sup> | Weight loss<br>/ % |                               | Total weight loss<br>/ % |
|--------------------------|--------------------|-------------------------------|--------------------------|
|                          | H <sub>2</sub> O   | CO <sub>3</sub> <sup>2-</sup> |                          |
| 1.7:1                    | 11.0               | 9.1                           | 20.1                     |
| 2.7:1                    | 11.3               | 12.5                          | 23.6                     |
| 4.1:1                    | 14                 | 9                             | 24.1                     |

<sup>a</sup>EDS.

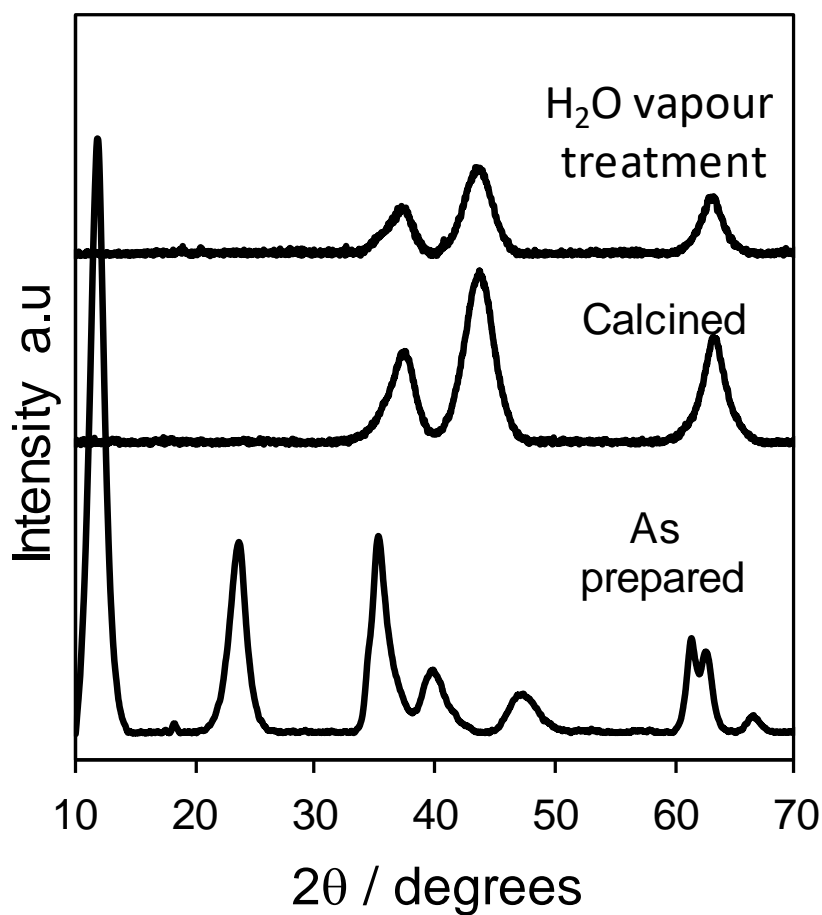

**Figure S3.** Powder XRD patterns of Ni<sub>4</sub>Al LDH after different hydrothermal treatments.

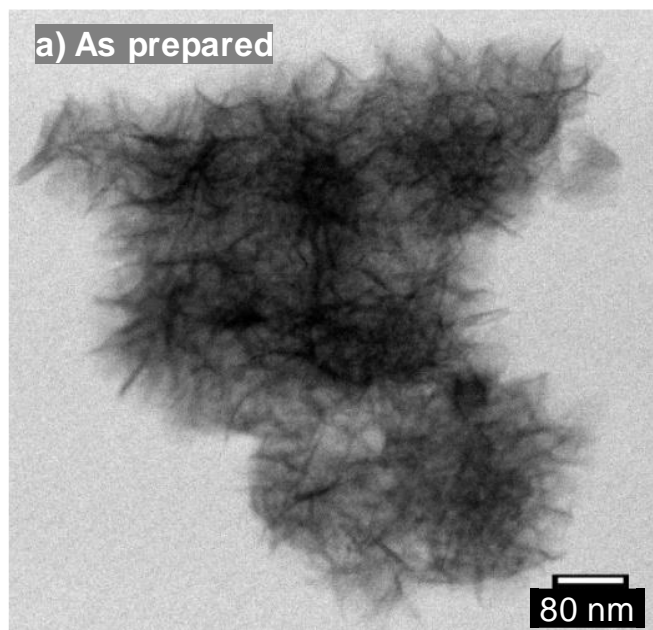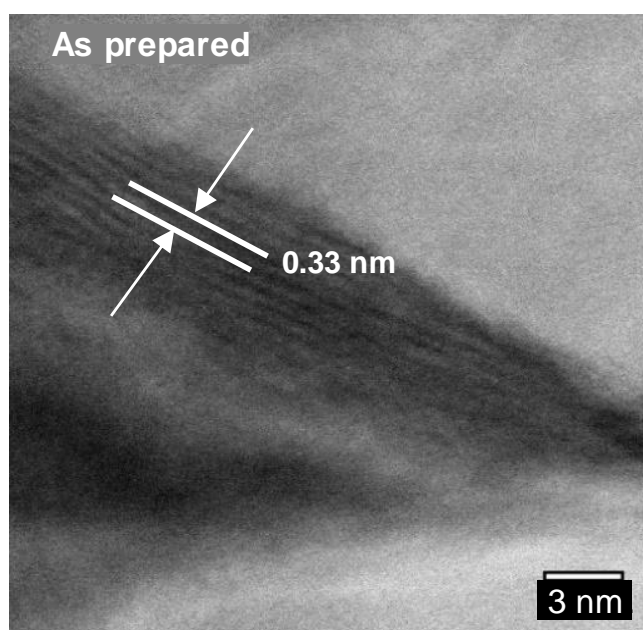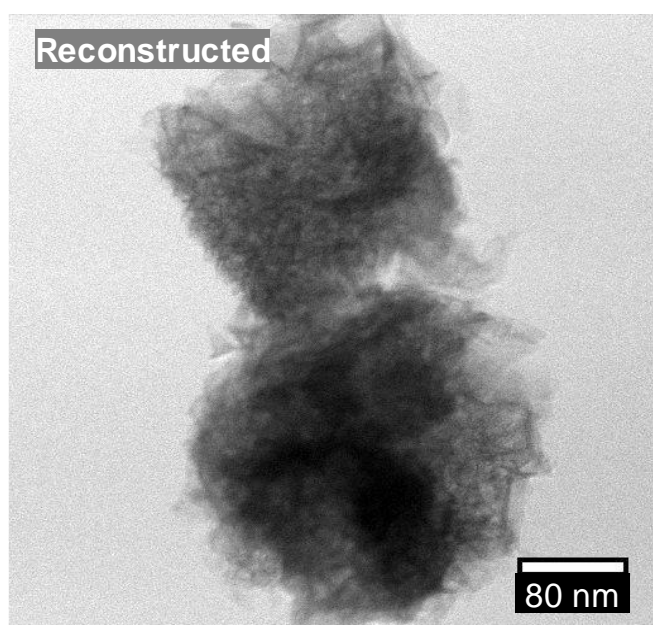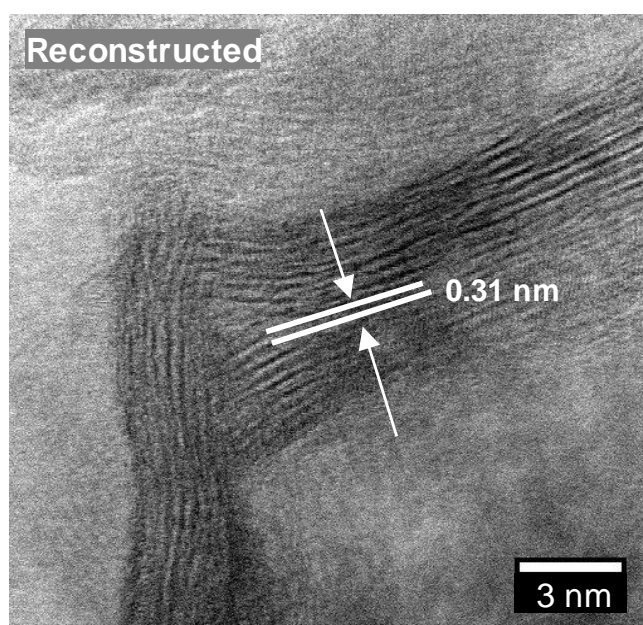

**Figure S4.** HRTEM images of (top) precipitated and (bottom) hydrothermally reconstructed  $\text{Ni}_{4.1}\text{Al}$  LDH. Hydrothermal treatment involved 350 °C calcination and subsequent 110 °C water treatment.

## 2. Transesterification reactions

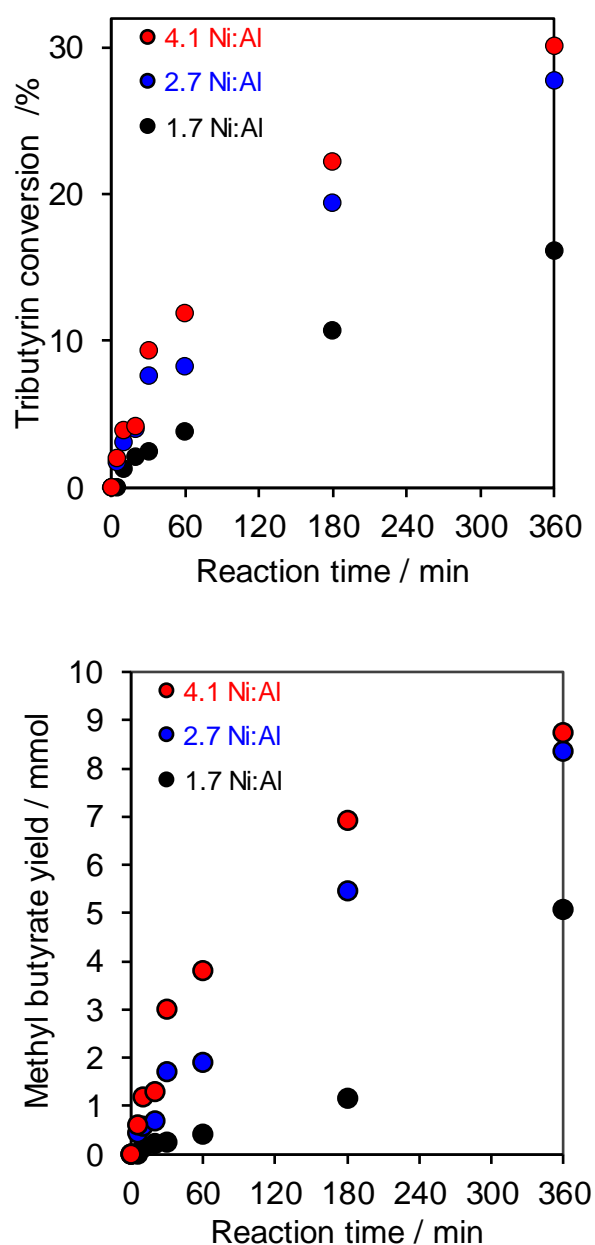

**Figure S5.** Reaction profiles for C4 TAG transesterification with methanol by NiAl LDH as a function of Ni:Al atomic ratio. Reaction conditions: 100 mg catalyst, 10 mmol of triglyceride (TAG), 308 mmol (12.5 ml) methanol with 0.0025 mol (0.59 cm<sup>3</sup>) dihexylether as internal standard. Reaction was done at 650 rpm, 110 °C for 24 hours.

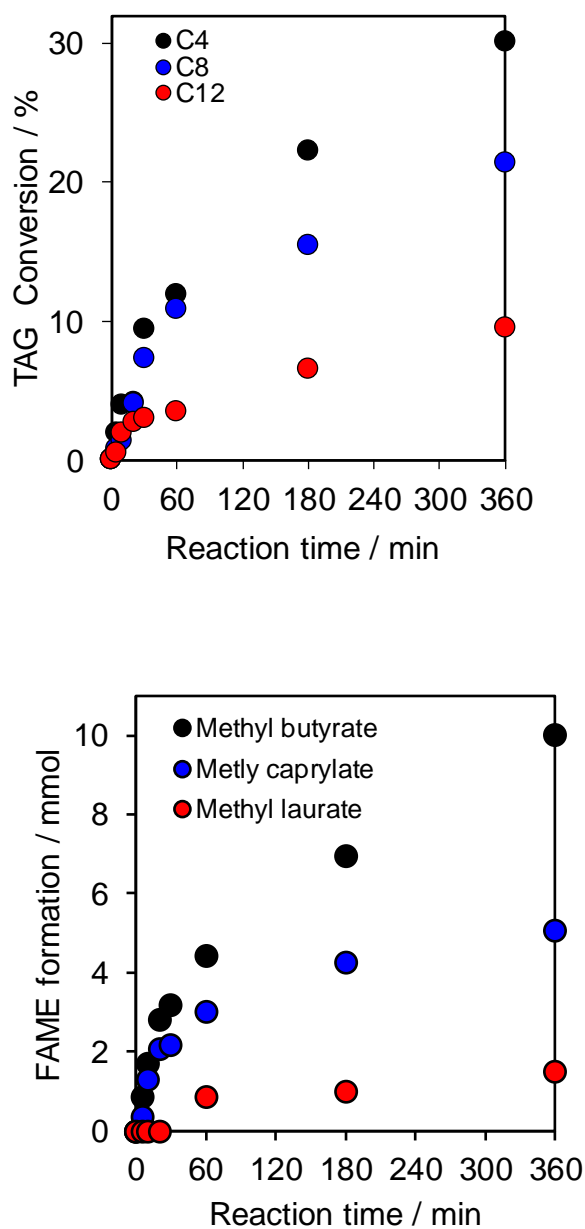

**Figure S6.** Reaction profiles for C<sub>4</sub>-C<sub>12</sub> TAG transesterification with methanol by reconstructed Ni<sub>4.1</sub>Al LDH. Reaction conditions: 100 mg catalyst, 10 mmol of triglyceride (TAG), 308 mmol (12.5 ml) methanol with 0.0025 mol (0.59 cm<sup>3</sup>) dihexylether as internal standard. 20 wt% 1-butanol was introduced for longer chain C<sub>8</sub>-C<sub>12</sub> TAGs (tricaprylin and trilaurin) to improve their miscibility. Reaction was performed at 110 °C, 650 rpm, for 24 hours.

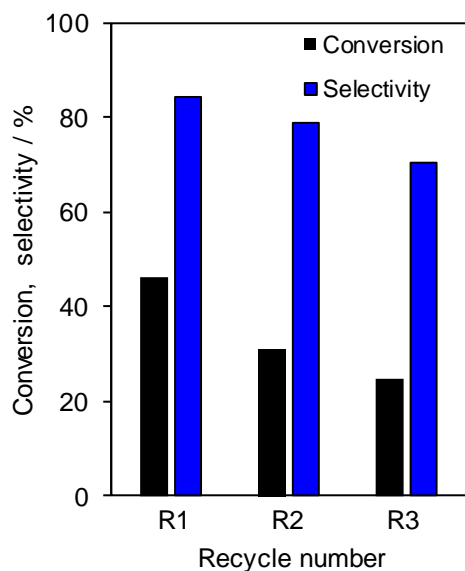

**Figure S7.** Recycling of hydrothermally reconstructed Ni<sub>4</sub>Al LDH in the transesterification of tributyrin with methanol. Reactions conditions: 100 mg catalyst, 110 °C, 10 mmol tributyrin (TAG), 30:1 methanol:TAG molar ratio, 650 rpm stirring, 24 h reaction.

**Table S2.** ICP-OES analysis on reconstructed Ni<sub>4</sub>Al LDH after 3 recycles.

| Sample                   | Atomic concentration / % |       | Ni:Al |
|--------------------------|--------------------------|-------|-------|
|                          | Ni                       | Al    |       |
| Fresh catalyst           | 64.96                    | 15.80 | 4.11  |
| Catalyst after 3rd cycle | 55.84                    | 13.71 | 4.07  |
